# Supplementary material
Source: publisher figshare collection journal article supplement (https://frontiersin.figshare.com/ndownloader/files/24547631)
Supplement: Supplementary file [file 24547631]

## Supplementary material

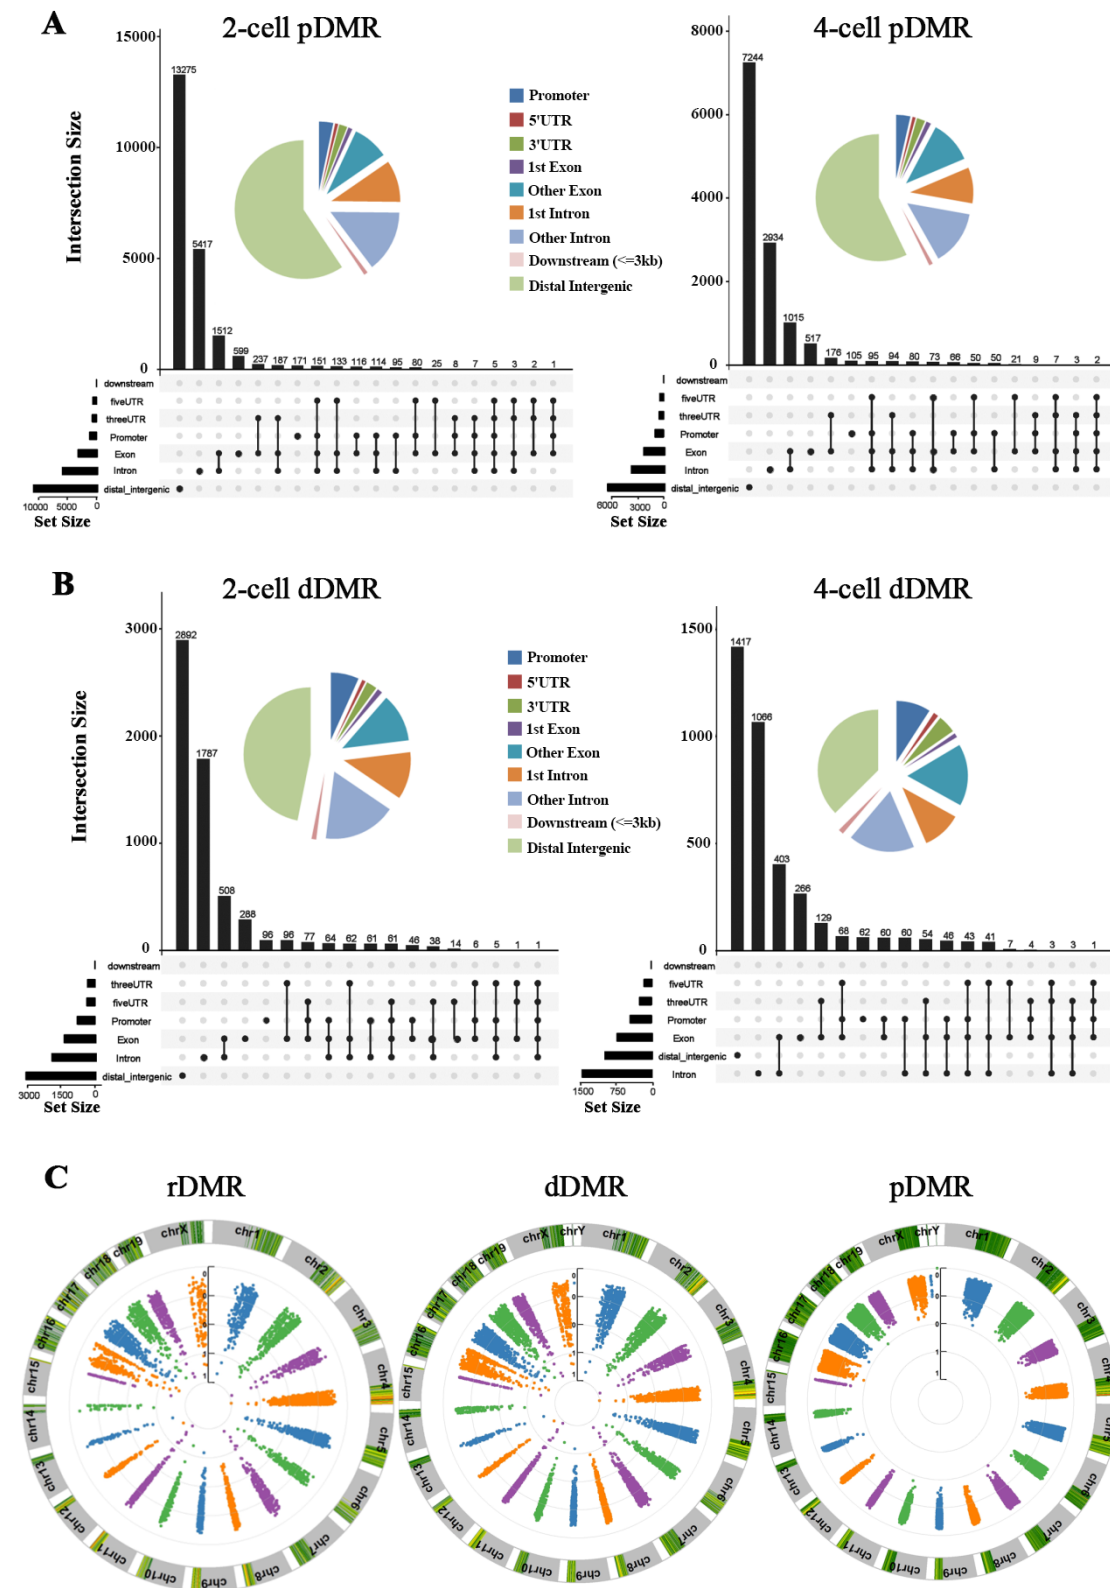

**Supplementary Figure 1** Distribution of DMRs genome functional areas and chromosomes.

**(A,B)** Genome functional areas distribution of pDMRs and dDMRs. Pie charts represent distribution proportion of DMRs in different genomic regions, and the inset graphs represent the number of DMRs distributed in single or combined genomic regions.

**(C)** Chromosome preference analysis of rDMRs, pDMRs and dDMRs. The number of dots represents the DMRs distribution across different chromosomes.



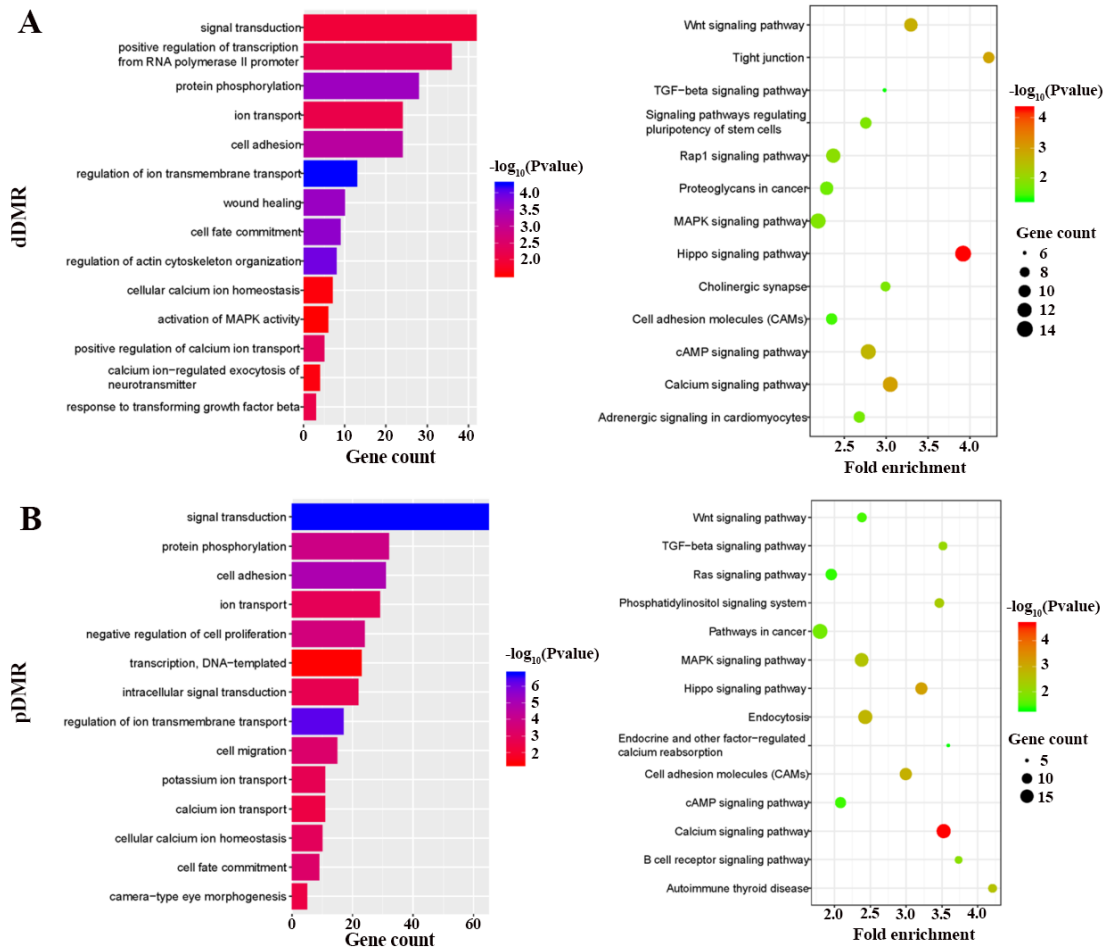

**Supplementary Figure 3** Functional analysis of dDMR and pDMR.

(A) GO term analysis of dDMRs (left) and KEGG pathway enrichment of dDMR (right).

(B) GO term analysis of pDMRs (left) and KEGG pathway enrichment of pDMR (right).

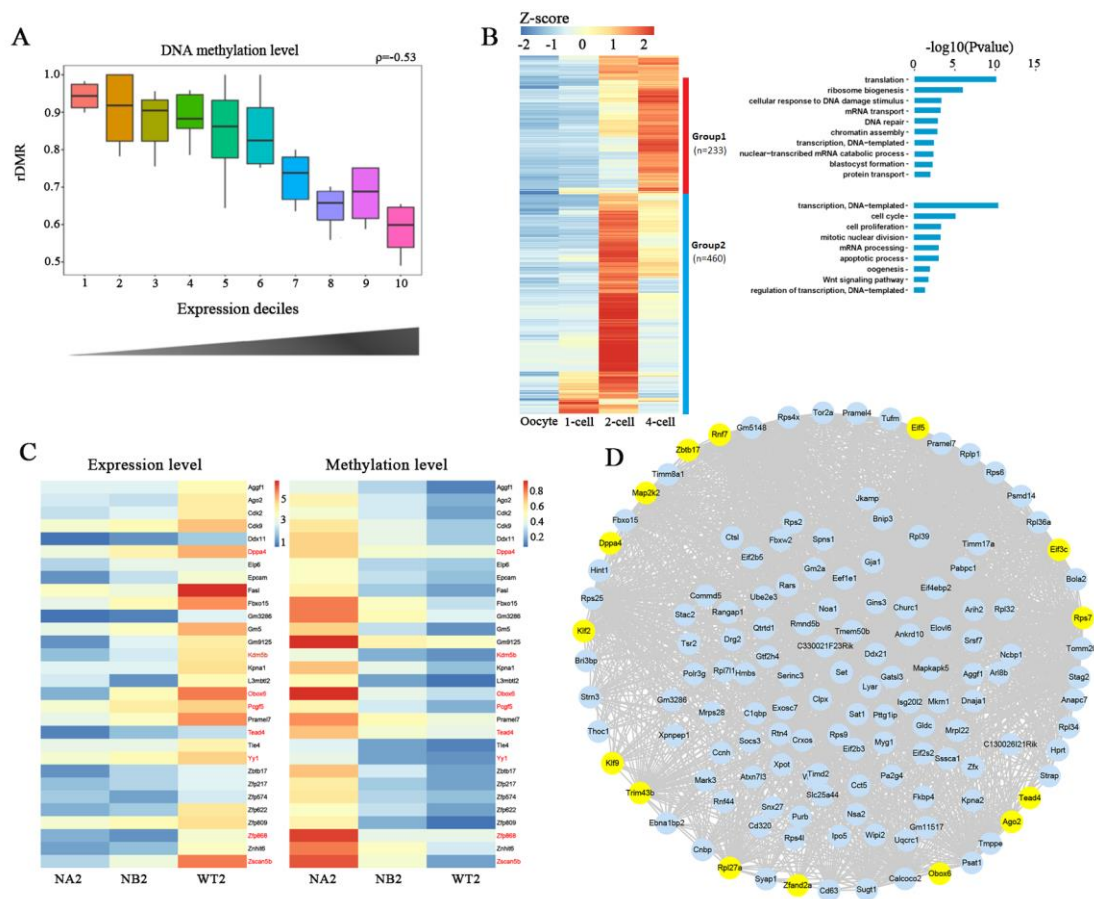

**Supplementary Figure 4** ZGA related genes with hyper methylation levels failed to activate in clone arrest embryos.

**(A)** Correlation between methylation level of rDMR and gene expression. In violin plots, the DNA methylation in genes promoter are divided into 10 deciles based on gene expression, Spearman coefficient  $\rho$  is -0.53.

**(B)** The heat map (left) of genes expression in fertilized embryos. Functional enrichment analysis (right) shows the biological process of totipotency-related genes expressed at 2-cell stage (group2) and 4-cell stage (group1).

**(C)** Heatmaps showing the expression levels (left) and DNA methylation levels (right) of 30 2-cell genes affected by hypermethylation patterns.

**(D)** Network diagram showing interaction of genes in the two modules of WGCNA production. Hub node genes are highlighted by yellow.

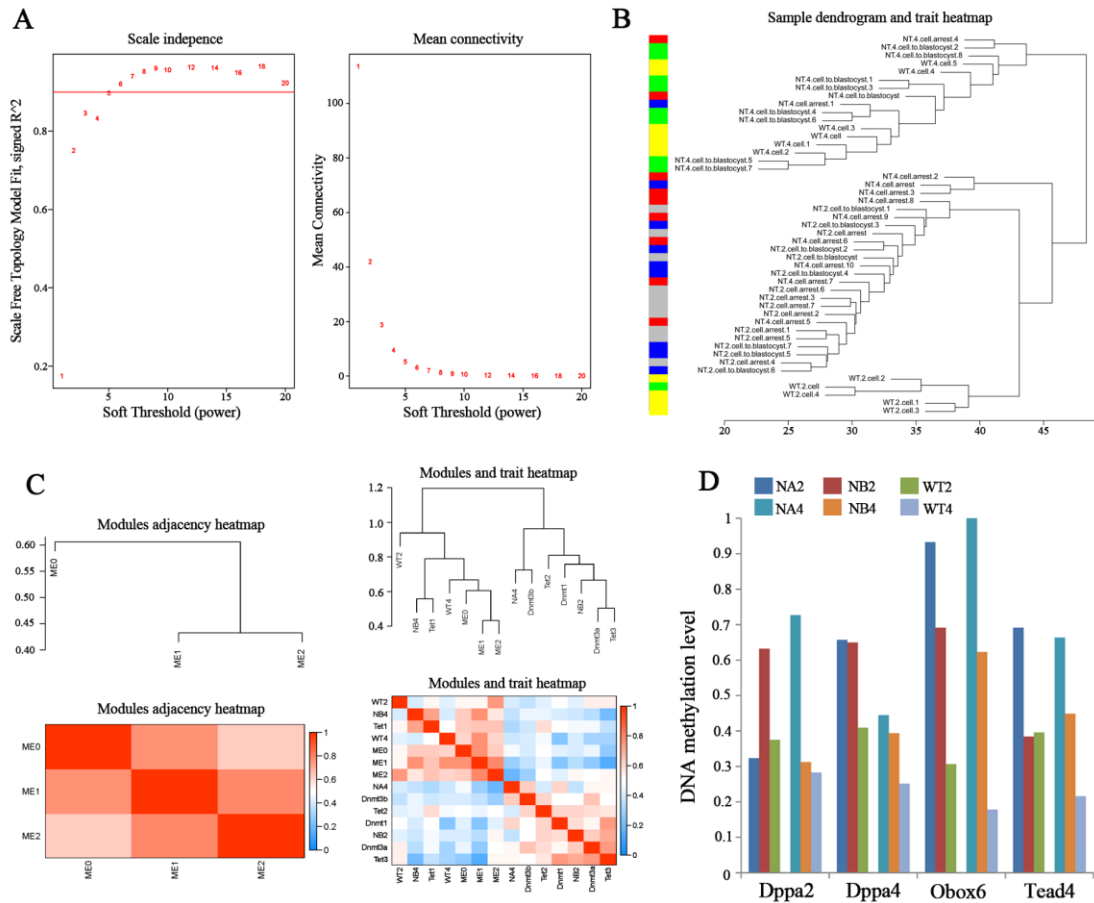

**Supplementary Figure 5** Weighted gene co-expression network analysis.

(A) Threshold analysis of the weighting coefficient  $\beta$  in the adjacency matrix. In order to make the network close to no scale,  $\beta$  is selected to be 5.

(B) Sample cluster analysis. The tree view shows correlation of all samples.

(C) Module cluster analysis. Through topology matrix, three modules ME0, ME1 and ME2 were generated in hierarchical clustering (left). The methyltransferases (Dnmt1, Dnmt3a and Dnmt3b) and the demethylases (Tet1, Tet2 and Tet3) were clustered with the modules (right). Degree of correlation was indicated by colors (from blue to red).

(D) The methylation levels of four key genes (Dppa2, Dppa4, Obox6, Tead4) in SCNT embryos and *in vivo* fertilized embryos.

**Supplementary Table 1 DNA methylation data set**

| Embryo type | Sample type     | CpG number | Mean depth |
|-------------|-----------------|------------|------------|
| SCNT        | Zygote          | 20655983   | 23.13      |
| SCNT        | 2-cell arrest   | 16960785   | 24.62      |
| SCNT        | 2-cell to blast | 16167658   | 28.53      |
| SCNT        | 4-cell arrest   | 16661565   | 29.44      |
| SCNT        | 4-cell to blast | 16321695   | 29.09      |
| WT          | Cumulus cell    | 19481721   | 11.40      |
| WT          | Zygote          | 18177526   | 16.82      |
| WT          | 2-cell          | 19357343   | 11.81      |
| WT          | 4-cell          | 19333182   | 13.80      |

**Supplementary Table 2 Transcriptome data set**

| Embryo type | Sample type     | Sample number |
|-------------|-----------------|---------------|
| SCNT        | 2-cell arrest   | 8             |
| SCNT        | 2-cell to blast | 9             |
| SCNT        | 4-cell arrest   | 5             |
| SCNT        | 4-cell to blast | 9             |
| WT          | Cumulus cell    | 6             |
| WT          | MII oocyte      | 6             |
| WT          | Zygote          | 5             |
| WT          | 2-cell          | 5             |
| WT          | 4-cell          | 6             |
